# Supplementary material for: Carbocyanine-Based Optical Sensor Array for the Discrimination of Proteins and Rennet Samples Using Hypochlorite Oxidation
Source: MDPI journal article supplement (doi:10.3390/s23094299), 2023-04-26
Supplement: s1 [file s1]

## Supplementary Materials to paper

### Carbocyanine-based Optical Sensor Array for the Discrimination of Proteins and Rennet Enzymes Using Hypochlorite Oxidation

by Anna V. Shik, Irina A. Stepanova, Irina A. Doroshenko, Tatyana A. Podrugina, and Mikhail K. Beklemishev\*

<sup>1</sup> Department of Chemistry, M.V.Lomonosov Moscow State University, GSP-1, Leninskie Gory, 1–3, 119991 Moscow, Russia

#### Spectral data for IR-783 dye

4-((*E*)-2-((*E*)-2-(2-chloro-3-((*E*)-2-(3,3-dimethyl-1-(4-sulfonatobutyl)-3*H*-indole-1-ium-2-yl)vinyl)cyclohex-2-en-1-ylidene)ethylidene)-3,3-dimethylindolin-1-yl)butan-1-sulfonate sodium

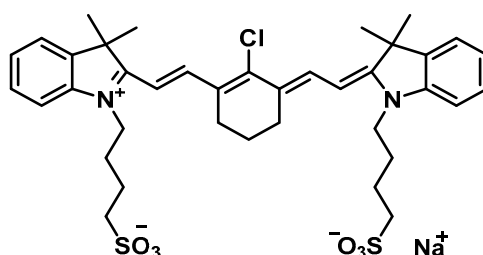

IR-783 was prepared according to paper: Okoh, O.A.; Bisby, R.H.; Lawrence, C.L.; Rolph, C.E.; Smith, R.B. Promising near-infrared non-targeted probes: benzothiazole heptamethine cyanine dyes. *J. Sulfur Chem.* **2014**, 35, 42–56. <https://doi.org/10.1080/17415993.2013.778258>.

Yield was 0.43 g (49%), dark green powder.  $\lambda_{\text{abs}} = 780$  nm (in methanol).  $\lambda_{\text{fl}} = 799$  nm (in ethanol).

<sup>1</sup>H NMR (400 MHz, CD<sub>3</sub>OD,  $\delta$ , ppm, J/Hz): 1.73 (s, 12 H, 2 C(CH<sub>3</sub>)<sub>2</sub>), 1.90 - 2.04 (m, 10 H, 5 CH<sub>2</sub>), 2.73 - 2.79 (m, 4 H, 2 CH<sub>2</sub>), 2.89 (t, 4 H, <sup>3</sup>J<sub>HH</sub> = 7.12, 2CH<sub>2</sub>SO<sub>3</sub><sup>-</sup>), 4.22 (t, 4 H, <sup>3</sup>J<sub>HH</sub> = 7.12, 2 CH<sub>2</sub>N<sup>+</sup>), 6.33 (d, 2 H, <sup>3</sup>J<sub>HH</sub> = 14.06, 2 =CH), 7.27 (t, 2 H, <sup>3</sup>J<sub>HH</sub> = 7.34, Ar), 7.34 - 7.45 (m, 4 H, Ar), 7.51 (d, 2 H, <sup>3</sup>J<sub>HH</sub> = 7.34, Ar), 8.44 (d, 2 H, <sup>3</sup>J<sub>HH</sub> = 14.00, =CH).

<sup>13</sup>C NMR (100 MHz, CD<sub>3</sub>OD  $\delta$ , ppm): 22.28, 22.72, 23.75, 27.45 (all CH<sub>2</sub>), 28.50 (C(CH<sub>3</sub>)<sub>2</sub>), 45.20 (C(CH<sub>3</sub>)<sub>2</sub>), 50.77 (CH<sub>2</sub>N<sup>+</sup>), 51.92 (CH<sub>2</sub>SO<sub>3</sub><sup>-</sup>), 102.64 (CH), 112.54 (Ar), 123.61 (CH), 126.63, 128.43, 130.07 (all Ar), 142.74 (C=C(Cl)-C), 143.75, 145.72 (all Ar), 151.22 (C-Cl) 174.32 (C=N).

IR,  $\nu/\text{cm}^{-1}$ : 1029.32 (C-Cl), 1166.24 (S=O), 1130.01, 1245.31 (CH<sub>2</sub>SO<sub>3</sub><sup>-</sup>), 1548.56 (C=N).

**Table S1.** An example of a data table used in the discrimination of model proteins. The intensities in the table were obtained using ImageJ software for the images captured at different reaction times. Only the upper left corner of the table is shown. R, G, B refer to the red, green and blue channels of visible light images

|    | A        | B               | C       | D       | E       | F       | G       | H       | I       | J       | K       |
|----|----------|-----------------|---------|---------|---------|---------|---------|---------|---------|---------|---------|
| 1  |          | IR-783, visible |         |         |         |         |         |         |         |         |         |
| 2  | Sample   | 1 min R         | 1 min G | 1 min B | 3 min R | 3 min G | 3 min B | 5 min R | 5 min G | 5 min B | 9 min R |
| 3  | Blank    | 179,329         | 164,896 | 94,29   | 182,265 | 170,799 | 102,757 | 182,5   | 172,156 | 109,961 | 178,25  |
| 4  | Blank    | 175,833         | 160,145 | 88,946  | 179,066 | 166,407 | 97,831  | 179,352 | 168,328 | 105,727 | 175,164 |
| 5  | Blank    | 171,951         | 157,776 | 89,035  | 175,017 | 163,319 | 98,005  | 176,242 | 166,438 | 107,18  | 172,152 |
| 6  | Blank    | 169,255         | 154,538 | 84,32   | 172,144 | 159,854 | 93,554  | 173,758 | 163,902 | 102,789 | 170,16  |
| 7  | Blank    | 164,419         | 148,954 | 80,544  | 168,675 | 156,039 | 89,039  | 170,113 | 158,895 | 95,391  | 166,25  |
| 8  | Blank    | 163,183         | 147,389 | 76,389  | 165,866 | 153,045 | 85,041  | 167,668 | 155,68  | 90,941  | 163,645 |
| 9  | BSA      | 154,015         | 147,645 | 95,37   | 177,298 | 160,984 | 90,057  | 180,816 | 163,469 | 91,055  | 178,055 |
| 10 | BSA      | 143,404         | 137,779 | 92,464  | 170,217 | 153,498 | 83,077  | 177,152 | 159,305 | 86,031  | 175,277 |
| 11 | BSA      | 145,506         | 136,597 | 89,199  | 169,314 | 152,079 | 81,124  | 174,086 | 156,176 | 83,375  | 170,77  |
| 12 | BSA      | 123,73          | 125,559 | 93,968  | 152,941 | 141,834 | 83,926  | 165,543 | 149,605 | 80,426  | 166,961 |
| 13 | BSA      | 121,258         | 126,005 | 93,752  | 150,711 | 142,825 | 84,59   | 161,34  | 147,645 | 78,301  | 164,434 |
| 14 | BSA      | 125,926         | 124,645 | 85,42   | 152,924 | 139,095 | 74,275  | 162,34  | 145,297 | 74,91   | 160,918 |
| 15 | HSA      | 136,009         | 123,964 | 95,227  | 169,118 | 145,894 | 84,164  | 180,672 | 160,156 | 87,27   | 178,613 |
| 16 | HSA      | 129,796         | 119,841 | 97,232  | 163,347 | 139,546 | 88,912  | 175,609 | 153,953 | 85,844  | 176,625 |
| 17 | HSA      | 132,723         | 121,095 | 94,33   | 165,057 | 142,883 | 86,771  | 174,578 | 154,801 | 80,719  | 172,906 |
| 18 | HSA      | 122,438         | 112,918 | 90,913  | 156,731 | 132,483 | 80,942  | 168,336 | 147,523 | 79,371  | 168,789 |
| 19 | HSA      | 123,863         | 113,425 | 92,207  | 156,244 | 132,248 | 83,715  | 166,375 | 145,078 | 78,688  | 166,254 |
| 20 | HSA      | 113,826         | 108,06  | 89,639  | 146,256 | 122,474 | 81,215  | 157,613 | 134,668 | 79,051  | 161,688 |
| 21 | Lysozyme | 124,867         | 129,869 | 96,666  | 157,897 | 143,081 | 82,407  | 172,574 | 154,574 | 79,707  | 174,211 |
| 22 | Lysozyme | 124,691         | 133,236 | 97,808  | 152,157 | 144,889 | 86,603  | 165,402 | 151,918 | 81,375  | 169,203 |
| 23 | Lysozyme | 127,111         | 130,231 | 96,118  | 159,374 | 143,73  | 84,234  | 169,594 | 151,438 | 75,746  | 170,75  |
| 24 | Lysozyme | 117,079         | 124,369 | 91,718  | 146,548 | 134,493 | 77,98   | 160,07  | 143,516 | 74,996  | 163,68  |
| 25 | Lysozyme | 108,473         | 121,907 | 91,589  | 138,581 | 131,397 | 78,513  | 152,363 | 139,281 | 75,383  | 158,094 |
| 26 | Lysozyme | 115,493         | 124,393 | 88,407  | 143,858 | 135,612 | 75,651  | 155,508 | 141,555 | 70,668  | 159,375 |
| 27 | Globulin | 124,131         | 127,866 | 102,361 | 166,602 | 147,57  | 86,847  | 178,012 | 158,828 | 84,918  | 177,918 |

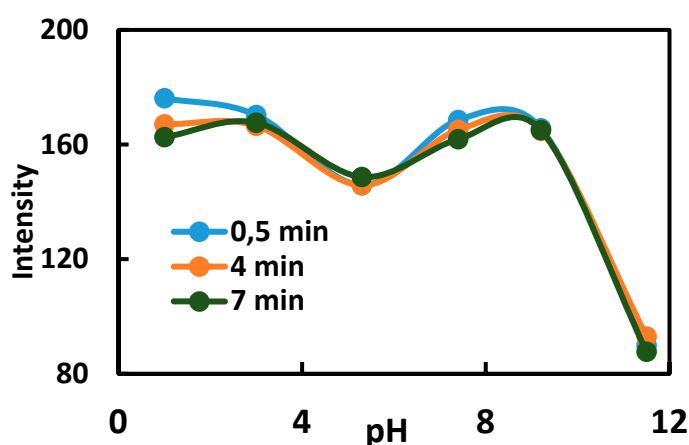

**Figure S1.** Red channel intensities for the visible photographs of the plate with *NaOCl* – *lysozyme* – *Cy5.5* mixture for the pH values from 1.0 to 11.5 and various reaction times. Other conditions as in Fig. 1.

**a**

**b**

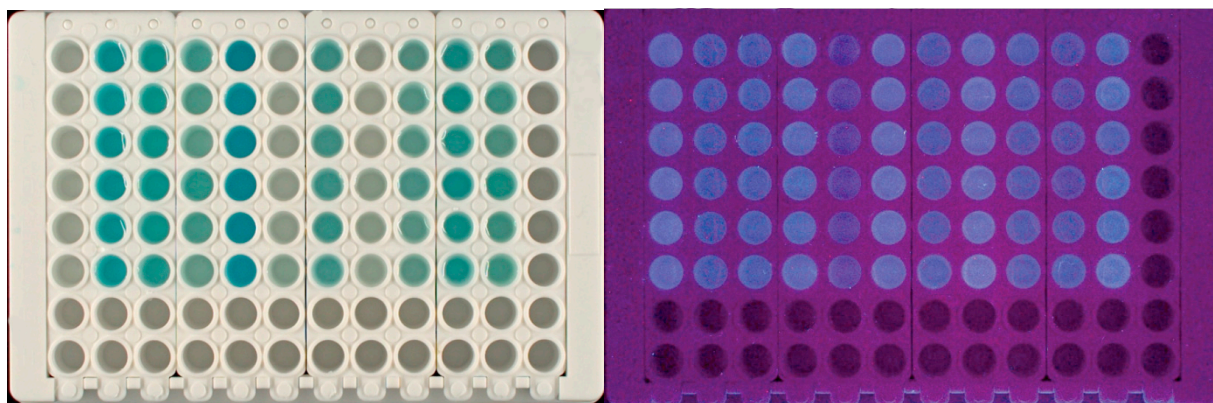

**c**

**d**

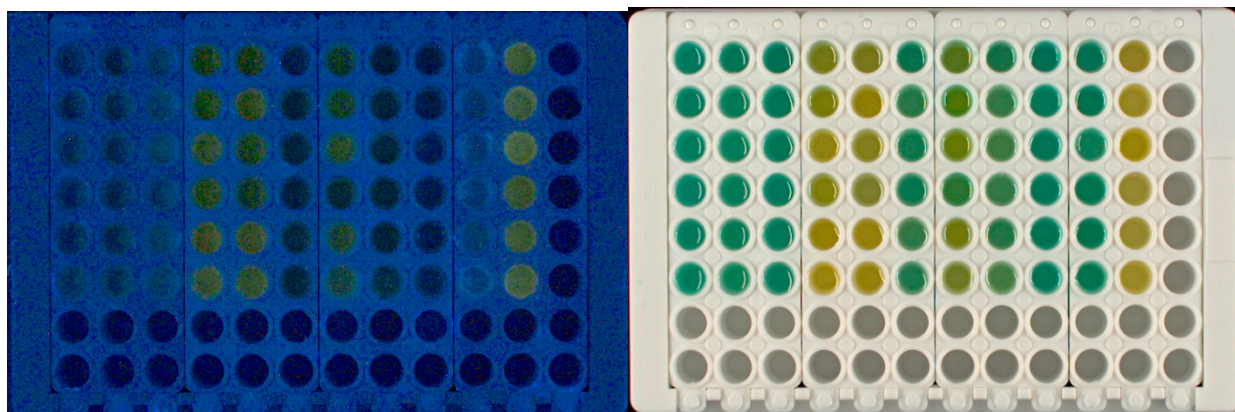

**Figure S2.** Images of the 96-well plates with the reaction mixtures of rennet samples with NaOCl and dyes: Cy5.5 (a, b) and IR-783 (c, d) in visible light (a, d) and under excitation with UV light at 254 nm (b) and 366 nm (c) captured 3 min (a, b) and 4 min (b, c) after the reaction start. Columns, from left to right: samples 1–10, blank.

**Table S2.** The amino acid composition of the proteins, mass %

| Protein            | Met | Cys | His | Trp | Tyr  | Arg | Gly  | Ref. |
|--------------------|-----|-----|-----|-----|------|-----|------|------|
| BSA                | 0.7 | 6.0 | 2.9 | 0.3 | 3.4  | 6.5 | 2.7  | [1]  |
| HSA                | 0.7 | 5.6 | 3.4 | 0.5 | 4.9  | 5.6 | 1.4  | [2]  |
| Lysozyme           | 1.6 | 6.2 | 0.8 | 4.7 | 2.3  | 8.5 | 9.3  | [3]  |
| $\gamma$ -Globulin | 0.9 | 2.1 | 2.4 | 2.6 | 5.8  | 4.0 | 3.4  | [4]  |
| Pepsin             | 1.5 | 4.7 | 0.8 | 4.7 | 11.6 | 1.6 | 11.1 | [5]  |
| Proteinase K       | 1.6 | 1.6 | 2.2 | 0.5 | 7.8  | 4.9 | 12.0 | [6]  |
| Chymosin           | 1.1 | 0.7 | 4.0 | 7.6 | 4.7  | 1.4 | 12.4 | [7]  |

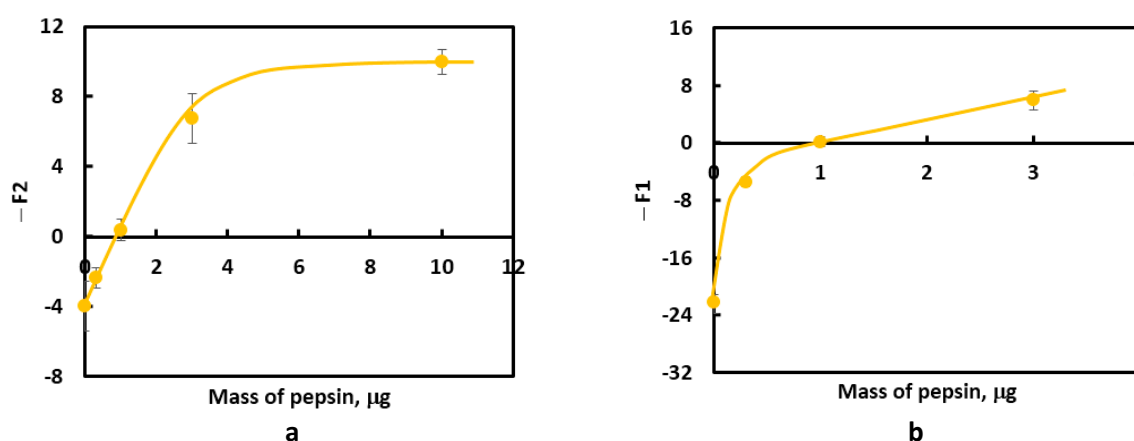

**Figure S3.** Dependences of LDA factors on the amount of pepsin per well: (a) on negative factor F2, (b) on negative factor F1.

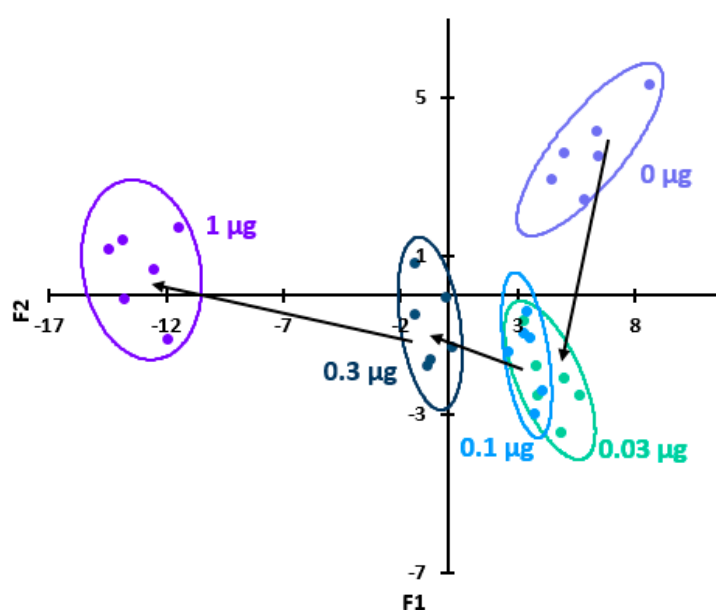

**Figure S4.** An LDA score plot for the low quantities of pepsin.

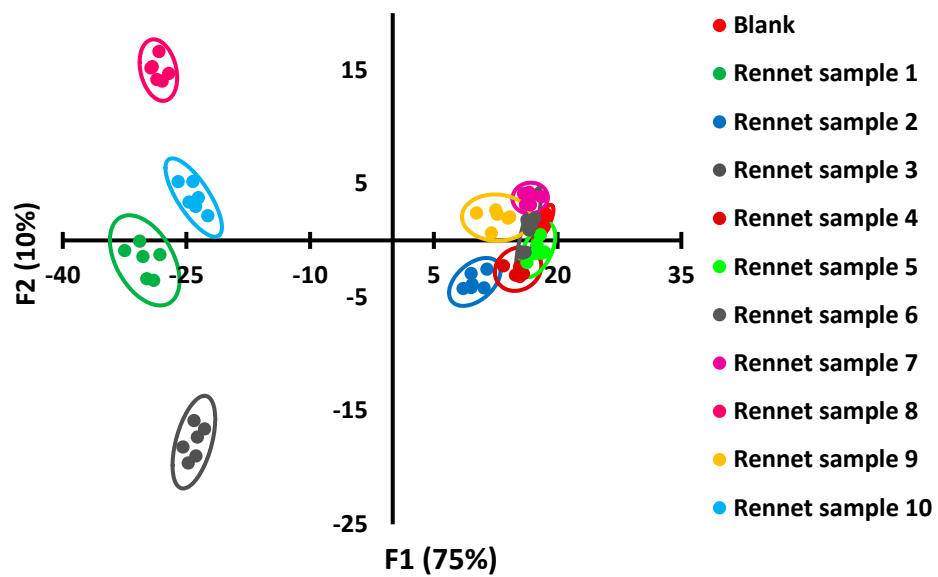

**Figure S5.** An LDA score plot for the discrimination of rennet samples, introduced as 1 g/L solutions (weight of sample/L).

**Table S3.** Full datasets used in this study. Each line represents a dataset obtained from a photograph (two right-hand columns), comments in the left-hand and central columns describe the dye and conditions of capturing the photos

I. Discrimination of model proteins

| <i>Dye</i> | <i>Spectral conditions</i>           | <i>Original dataset*</i> | <i>Data columns left by the software after LDA procedure**</i> |
|------------|--------------------------------------|--------------------------|----------------------------------------------------------------|
| IR-783     | Visible absorbance                   | 1, R                     |                                                                |
|            |                                      | 1, G                     |                                                                |
|            |                                      | 1, B                     | 1, B                                                           |
|            |                                      | 3, R                     | 3, R                                                           |
|            |                                      | 3, G                     |                                                                |
|            |                                      | 3, B                     | 3, B                                                           |
|            |                                      | 5, R                     |                                                                |
|            |                                      | 5, G                     | 5, G                                                           |
|            |                                      | 5, B                     |                                                                |
|            |                                      | 9, R                     | 9, R                                                           |
|            |                                      | 9, G                     | 9, G                                                           |
|            |                                      | 9, B                     |                                                                |
|            |                                      | 21, R                    |                                                                |
|            |                                      | 21, G                    |                                                                |
|            |                                      | 21, B                    |                                                                |
|            |                                      | 51, R                    |                                                                |
|            |                                      | 51, G                    | 51, G                                                          |
|            |                                      | 51, B                    | 51, B                                                          |
|            | Fluorescence excited by 366 nm light | 1, R                     |                                                                |
|            |                                      | 1, G                     |                                                                |
|            |                                      | 1, B                     |                                                                |
|            |                                      | 3, R                     | 3, R                                                           |
|            |                                      | 3, G                     |                                                                |
|            |                                      | 3, B                     | 3, B                                                           |
|            | Near-IR fluorescence                 | 3                        | 3                                                              |
|            |                                      | 6                        | 6                                                              |
| Cy5.5      | Visible absorbance                   | 2, R                     |                                                                |
|            |                                      | 2, G                     | 2, G                                                           |
|            |                                      | 2, B                     | 2, B                                                           |
|            |                                      | 5, R                     | 5, R                                                           |
|            |                                      | 5, G                     |                                                                |
|            |                                      | 5, B                     |                                                                |
|            |                                      | 8, R                     |                                                                |
|            |                                      | 8, G                     | 8, G                                                           |
|            |                                      | 8, B                     |                                                                |
|            |                                      | 13, R                    |                                                                |
|            |                                      | 13, G                    | 13, G                                                          |
|            |                                      | 13, B                    |                                                                |

|  |                                      |       |       |
|--|--------------------------------------|-------|-------|
|  |                                      | 27, R | 27, R |
|  |                                      | 27, G |       |
|  |                                      | 27, B | 27, B |
|  | Fluorescence excited by 254 nm light | 2, R  | 2, R  |
|  |                                      | 2, G  | 2, G  |
|  |                                      | 2, B  | 2, B  |
|  | Fluorescence excited by 366 nm light | 2, R  |       |
|  |                                      | 2, G  |       |
|  |                                      | 2, B  | 2, B  |
|  | Near-IR fluorescence                 | 2     |       |
|  |                                      | 15    | 15    |

\* Minutes from the reaction start and RGB channels are shown

\*\*After sorting out insignificant data columns (variables)

## II. Discrimination of rennet samples (1 g/L solutions)

| <i>Dye</i> | <i>Spectral conditions</i> | <i>Original dataset</i> | <i>Data columns left by the software after LDA procedure</i> |
|------------|----------------------------|-------------------------|--------------------------------------------------------------|
| IR-783     | Visible absorbance         | 1, R                    | 1, R                                                         |
|            |                            | 1, G                    | 1, G                                                         |
|            |                            | 1, B                    | 1, B                                                         |
|            |                            | 2, R                    | 2, R                                                         |
|            |                            | 2, G                    | 2, G                                                         |
|            |                            | 2, B                    | 2, B                                                         |
|            |                            | 3, R                    |                                                              |
|            |                            | 3, G                    |                                                              |
|            |                            | 3, B                    |                                                              |
|            |                            | 5, R                    | 5, R                                                         |
|            |                            | 5, G                    |                                                              |
|            |                            | 5, B                    | 5, B                                                         |
|            |                            | 8, R                    | 8, R                                                         |
|            |                            | 8, G                    | 8, G                                                         |
|            |                            | 8, B                    | 8, B                                                         |
|            |                            | 18, R                   | 18, R                                                        |
|            |                            | 18, G                   | 18, G                                                        |
|            |                            | 18, B                   |                                                              |
|            | Near-IR fluorescence       | 3                       | 3                                                            |
|            |                            | 7                       |                                                              |
|            |                            | 20                      | 20                                                           |
| Cy5.5      | Visible absorbance         | 1, R                    |                                                              |
|            |                            | 1, G                    | 1, G                                                         |
|            |                            | 1, B                    | 1, B                                                         |
|            |                            | 2, R                    | 2, R                                                         |
|            |                            | 2, G                    |                                                              |
|            |                            | 2, B                    | 2, B                                                         |
|            |                            | 5, R                    |                                                              |

|  |                                      |      |      |
|--|--------------------------------------|------|------|
|  |                                      | 5, G | 5, G |
|  |                                      | 5, B | 5, B |
|  | Fluorescence excited by 254 nm light | 1, R | 1, R |
|  |                                      | 1, G | 1, G |
|  |                                      | 1, B | 1, B |
|  | Near-IR fluorescence                 | 1    | 1    |

### III. Discrimination of rennet samples with the 3 g/L solutions

| <i>Dye</i> | <i>Spectral conditions</i>           | <i>Original dataset</i> | <i>Data columns left by the software after LDA procedure</i> |
|------------|--------------------------------------|-------------------------|--------------------------------------------------------------|
| IR-783     | Visible absorbance                   | 2, R                    | 2, R                                                         |
|            |                                      | 2, G                    |                                                              |
|            |                                      | 2, B                    | 2, B                                                         |
|            |                                      | 5, R                    |                                                              |
|            |                                      | 5, G                    |                                                              |
|            |                                      | 5, B                    |                                                              |
|            |                                      | 9, R                    |                                                              |
|            |                                      | 9, G                    |                                                              |
|            |                                      | 9, B                    |                                                              |
|            |                                      | 18, R                   |                                                              |
|            |                                      | 18, G                   |                                                              |
|            |                                      | 18, B                   |                                                              |
|            |                                      | 29, R                   | 8, R                                                         |
|            |                                      | 29, G                   | 29, G                                                        |
|            |                                      | 29, B                   | 29, B                                                        |
|            |                                      | 40, R                   | 40, R                                                        |
|            |                                      | 40, G                   |                                                              |
|            |                                      | 40, B                   |                                                              |
|            | Fluorescence excited by 366 nm light | 1                       | 1                                                            |
|            | Near-IR fluorescence                 | 30                      | 30                                                           |
| Cy5.5      | Visible absorbance                   | 1, R                    | 1, R                                                         |
|            |                                      | 1, G                    |                                                              |
|            |                                      | 1, B                    | 1, B                                                         |
|            |                                      | 7, R                    | 7, R                                                         |
|            |                                      | 7, G                    | 7, G                                                         |
|            |                                      | 7, B                    |                                                              |
|            |                                      | 18, R                   | 18, R                                                        |
|            |                                      | 18, G                   | 18, G                                                        |
|            |                                      | 18, B                   | 18, B                                                        |
|            | Fluorescence excited by 254 nm light | 1, R                    | 1, R                                                         |
|            |                                      | 1, G                    | 1, G                                                         |
|            |                                      | 1, B                    | 1, B                                                         |
|            | Near-IR fluorescence                 | 1                       |                                                              |
|            |                                      | 17                      |                                                              |



**Table S4.** Accuracy of discrimination of rennet samples at 1 g/L for various datasets

| Data<br>set No | Data columns included in the original dataset |          |     |        |          |     | Number of data columns |          | Accuracy<br>by cross-<br>validation |
|----------------|-----------------------------------------------|----------|-----|--------|----------|-----|------------------------|----------|-------------------------------------|
|                | Cy5.5                                         |          |     | IR-783 |          |     |                        |          |                                     |
|                | vis                                           | UV (254) | NIR | vis    | UV (366) | NIR | original               | after DA |                                     |
| 1              | +                                             | +        | +   | +      | +        | +   | 34                     | 23       | 92                                  |
| 2              | +                                             | -        | +   | +      | -        | +   | 31                     | 24       | 91                                  |
| 3              | +                                             | -        | -   | +      | -        | -   | 27                     | 23       | 91                                  |
| 4              | +                                             | -        | +   | +      | -        | +   | 27                     | 23       | 91                                  |
| 5              | -                                             | -        | -   | +      | -        | +   | 21                     | 13       | 85                                  |
| 6              | -                                             | -        | -   | +      | -        | -   | 18                     | 14       | 87                                  |
| 7              | +                                             | -        | +   | -      | -        | -   | 10                     | 9        | 75                                  |
| 8              | -                                             | -        | +   | -      | -        | +   | 4                      | 3        | 69                                  |

## References

1. Abdelmoez, W.; Yoshida, H. Production of Amino and Organic Acids from Protein Using Sub-Critical Water Technology. *Int. J. Chem. React. Engin.* **2013**, *11*, 1-16. DOI: 10.1515/ijcre-2013-0017.
2. Spahr, I. F.; Edsall, J.T. Amino acid composition of human and bovine serum mercaptalbumins. *J. Biol. Chem.* **1964**, *239*, 850 – 854. DOI: 10.1016/S0021-9258(18)51668-9.
3. Paice, M. G.; Jurasek, L. Structural and Mechanistic Comparisons of Some  $\beta$ -(1  $\rightarrow$  4) Glycoside Hydrolases. Hydrolysis of Cellulose: Mechanisms of Enzymatic and Acid Catalysis. *Adv. Chem.* **1979**, *361* – 374. DOI: 10.1021/ba-1979-0181.ch018.
4. Crumpton, M.J.; Wilkinson, J.M. Amino acid compositions of human and rabbit gamma-globulins and of the fragments produced by reduction. *Biochem J.* **1963**, *88*, 228–234. DOI: 10.1042/bj0880228.
5. Mills, J.; Tang, J. Molecular weight and amino acid composition of human gastricsin and pepsin. *J. Biol. Chem.* **1967**, *242*, 3093–3097. DOI: 10.1016/S0021-9258(18)95937-5.
6. Dattagupta, J.K.; Fujiwara, T.; Grishin, E.V.; Lindner, K.; Manor, P.C.; Pieniazek, N.J.; Saenger, W.; Suck, D. Crystallization of the fungal enzyme proteinase K and amino acid composition. *J. Mol. Biol.* **1975**, *97*, 267–271. DOI: 10.1016/S0022-2836(75)80039-8
7. Yu, J.; Iwasaki, S.; Tamura, G.; Arima, K. Physical Properties and Amino Acid Composition of Mucor-rennin Crystal Isolated from *Mucor pusillus* var. *Lindt. Agric. Biol. Chem.* **1968**, *32*, 1051–1052. DOI: 10.1080/00021369.1968.10859184.
